# Supplementary material
Source: publisher figshare collection journal article supplement (https://acs.figshare.com/ndownloader/files/3962044)
Supplement: Supplementary file 1 [file 3962044]

# **Benzodithiophene-Thiadiazoloquinoxaline as an Acceptor for Ambipolar Copolymers with Deep LUMO Level and Distinct Linkage Pattern**

**Cunbin An, Xin Guo, Timea Stelzig, Sreenivasa Reddy Puniredd, Yanfei Zhao, Wojciech Pisula  
and Martin Baumgarten\***

*Max Planck Institute for Polymer Research, Ackermannweg 10, 55128 Mainz, Germany*

*[martin.baumgarten@mpip-mainz.mpg.de](mailto:martin.baumgarten@mpip-mainz.mpg.de)*

## **Contents**

|                                                   |        |
|---------------------------------------------------|--------|
| TGA curves of <b>PBDTTQ-1</b> and <b>PBDTTQ-2</b> | S2     |
| 2DWAXS of <b>PBDTTQ-1</b> and <b>PBDTTQ-2</b>     | S3     |
| GIWAXS of <b>PBDTTQ-1</b> and <b>PBDTTQ-2</b>     | S4     |
| <sup>1</sup> H and <sup>13</sup> C NMR spectra    | S5-S16 |
| UV-Vis absorption spectra upon TFA doping         | S17    |

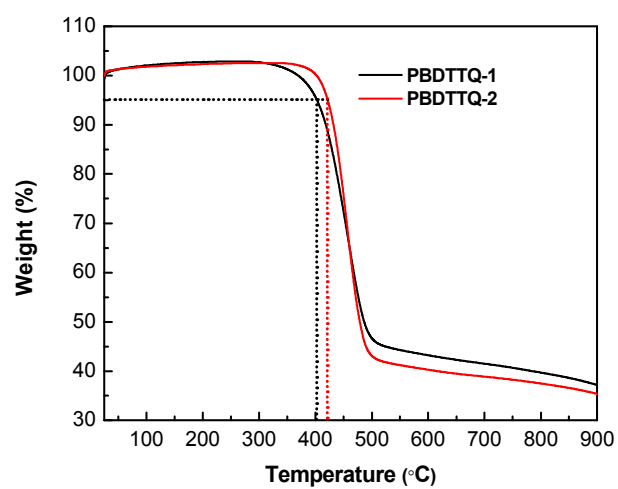

**Figure S1.** TGA curves for **PBDTTQ-1** and **PBDTTQ-2** measured under a nitrogen atmosphere at a heating rate of 10 °C/min.

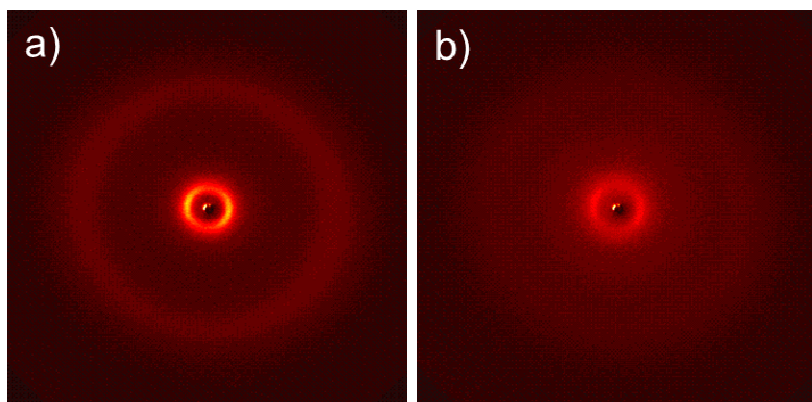

**Figure S2.** 2DWAXS of a) PBDTTQ-1 and b) PBDTTQ-2. The fiber sample was mounted vertical towards the 2D detector.

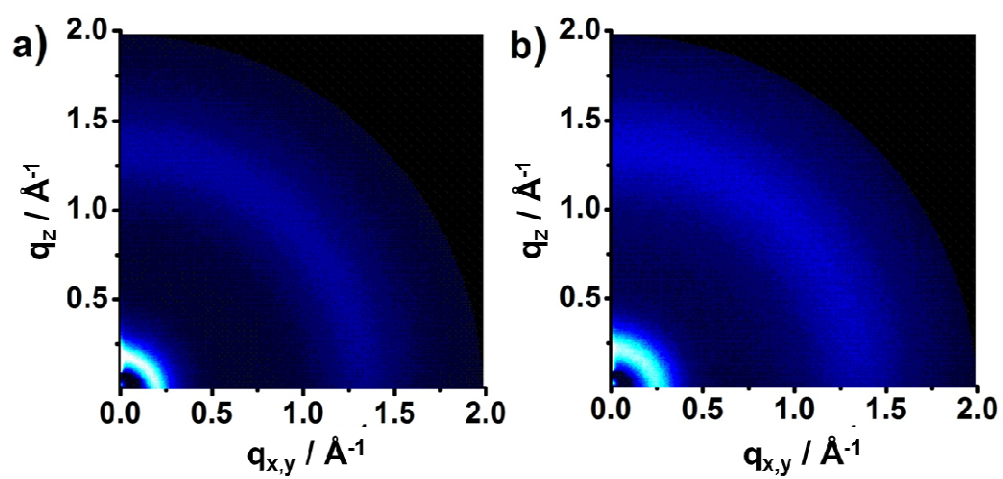

**Figure S3.** GIWAXS of a) PBDTTQ-1 and b) PBDTTQ-2.

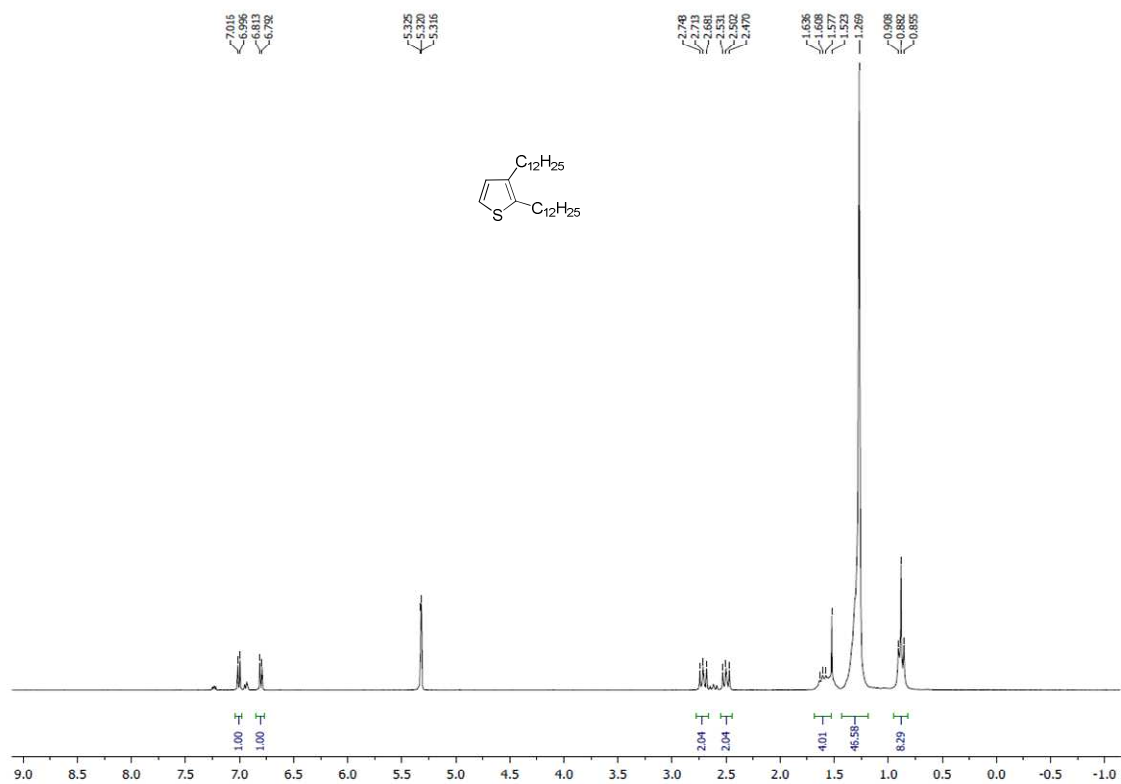

**Figure S4.** <sup>1</sup>H NMR spectrum of compound **2**.

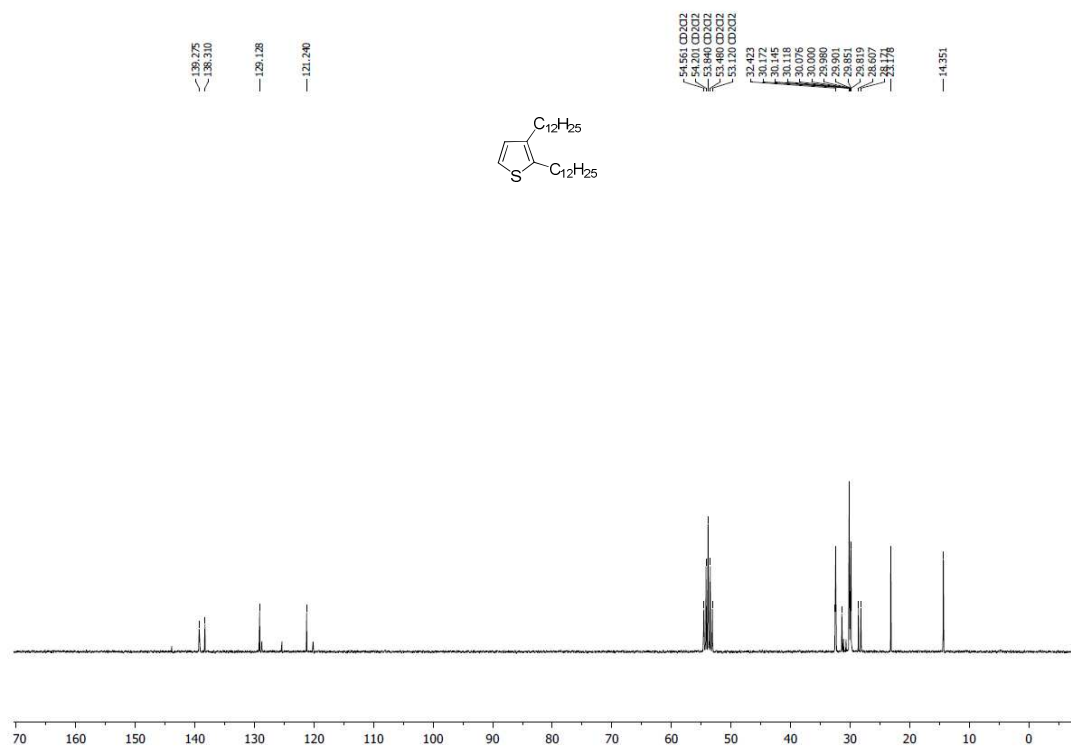

**Figure S5.** <sup>13</sup>C NMR spectrum of compound **2**.

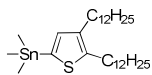

Chemical structure of poly(2,5-diethylthiophene): \*C1=CC(=C(C1)S)CC\*

<sup>13</sup>C NMR spectrum (CDCl<sub>3</sub>) showing peaks for the polymer. The x-axis represents chemical shift in ppm, ranging from 70 to -10.

Peak list (ppm):

- 145.262
- 139.770
- 137.717
- 132.734
- 54.561 CDCl<sub>3</sub>
- 54.200 CDCl<sub>3</sub>
- 53.840 CDCl<sub>3</sub>
- 53.480 CDCl<sub>3</sub>
- 53.120 CDCl<sub>3</sub>
- 32.573
- 32.419
- 32.156
- 31.893
- 30.165
- 30.143
- 30.108
- 30.080
- 29.844
- 29.804
- 29.846
- 29.794
- 29.754
- 14.351
- 8.269

- S6 -

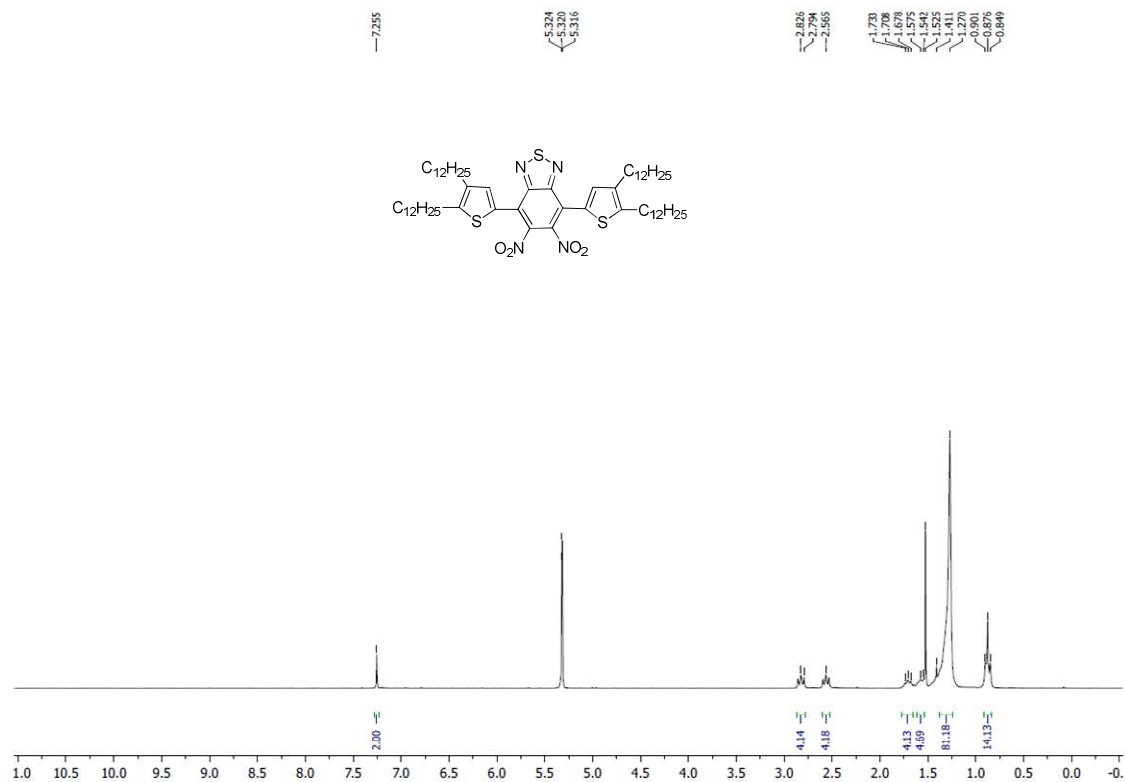

Figure S8. <sup>1</sup>H NMR spectrum of compound 5.

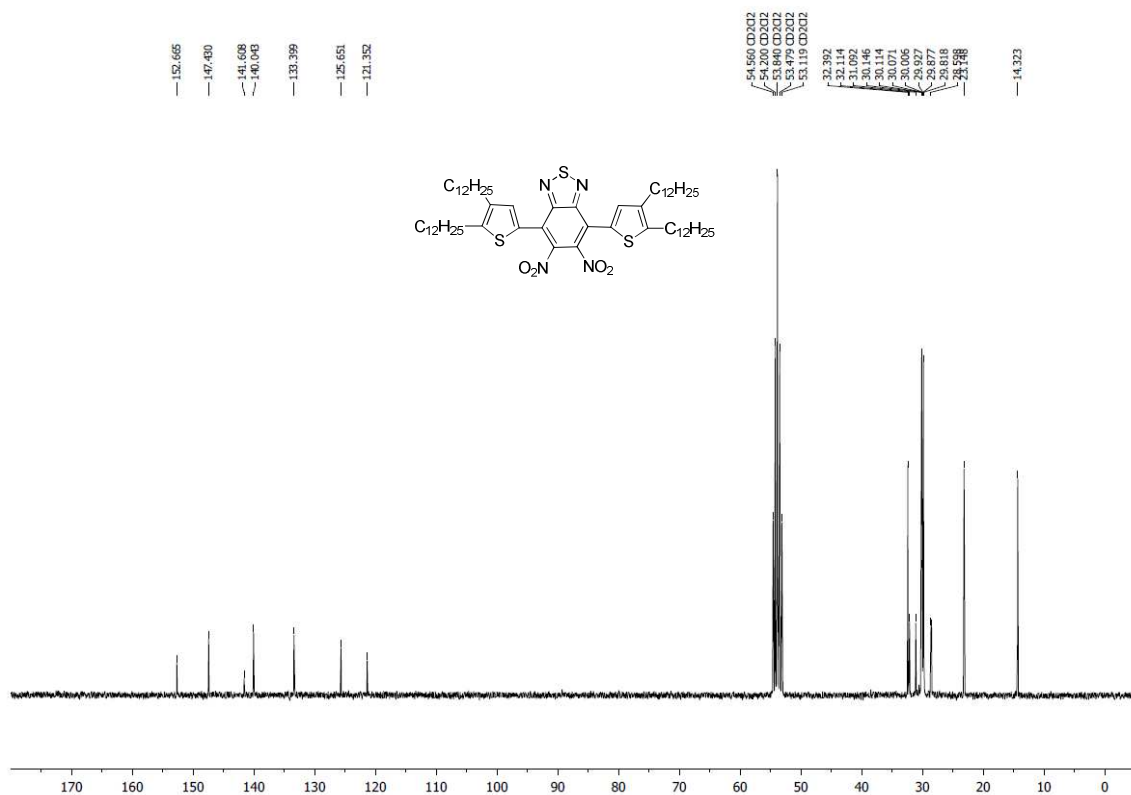

Figure S9. <sup>13</sup>C NMR spectrum of compound 5.

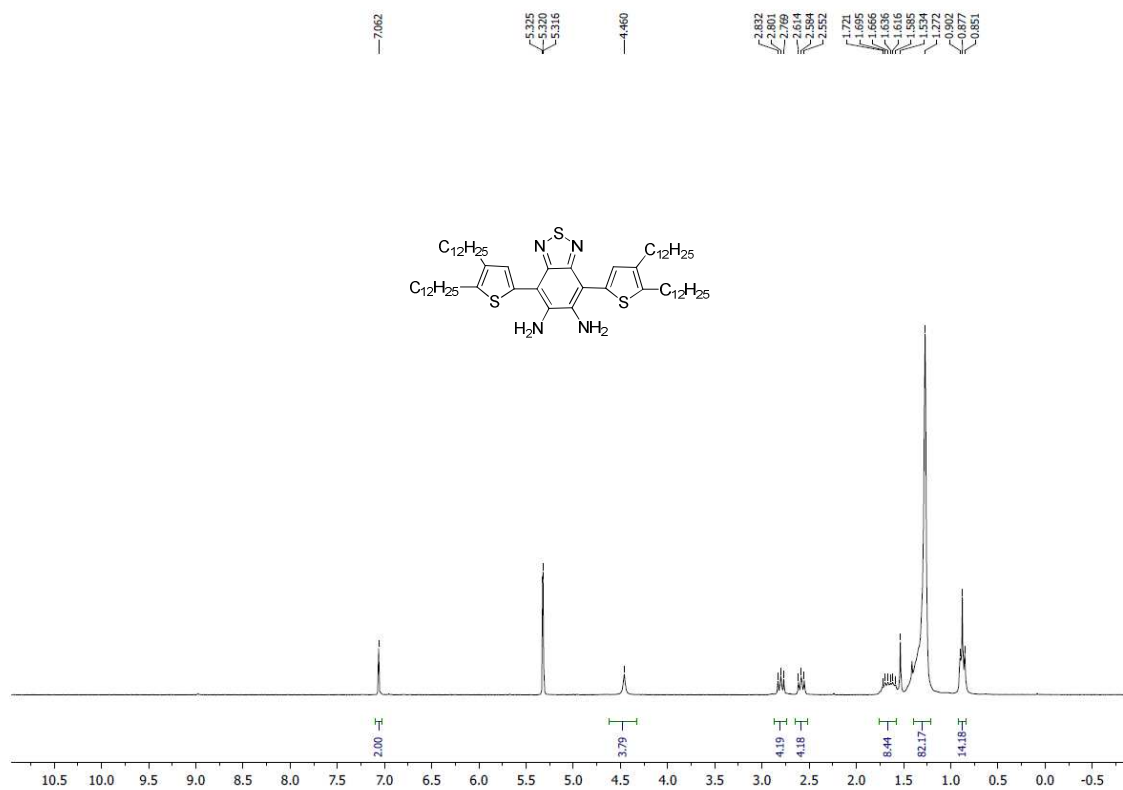

Figure S10. <sup>1</sup>H NMR spectrum of compound 6.

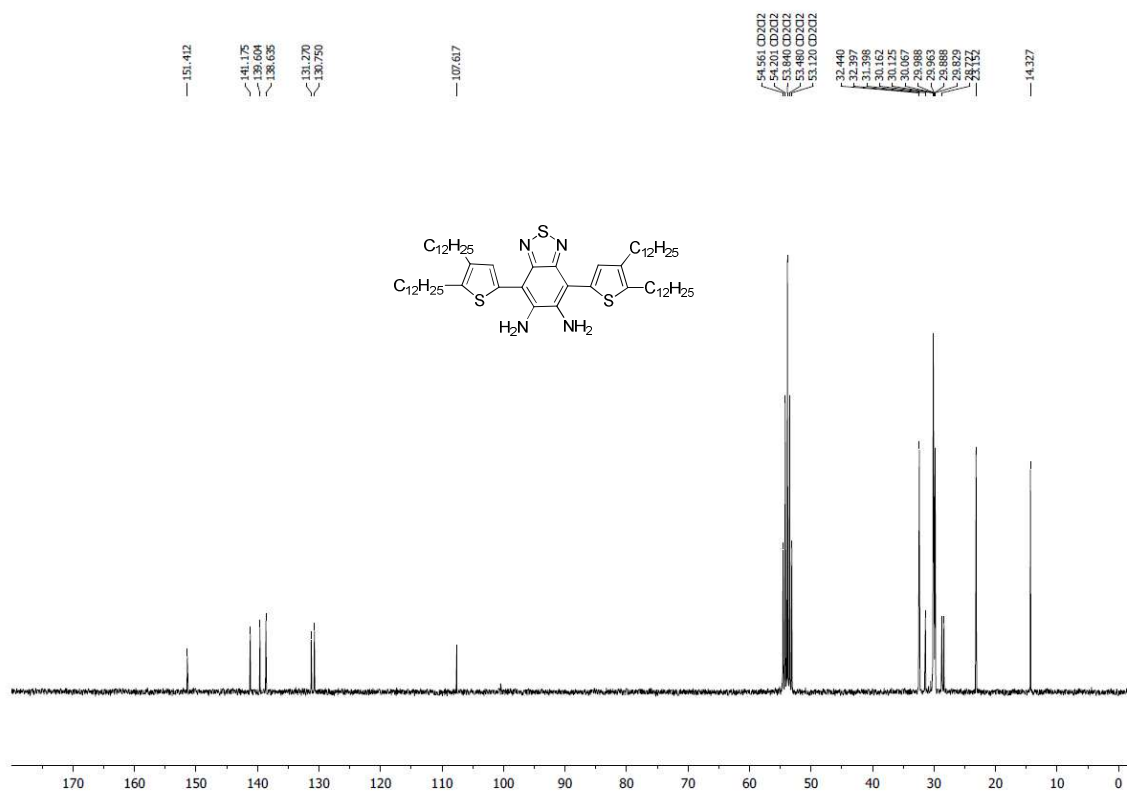

Figure S11. <sup>13</sup>C NMR spectrum of compound 6.



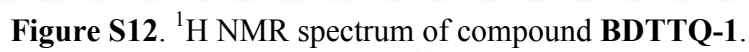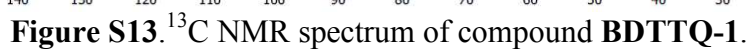

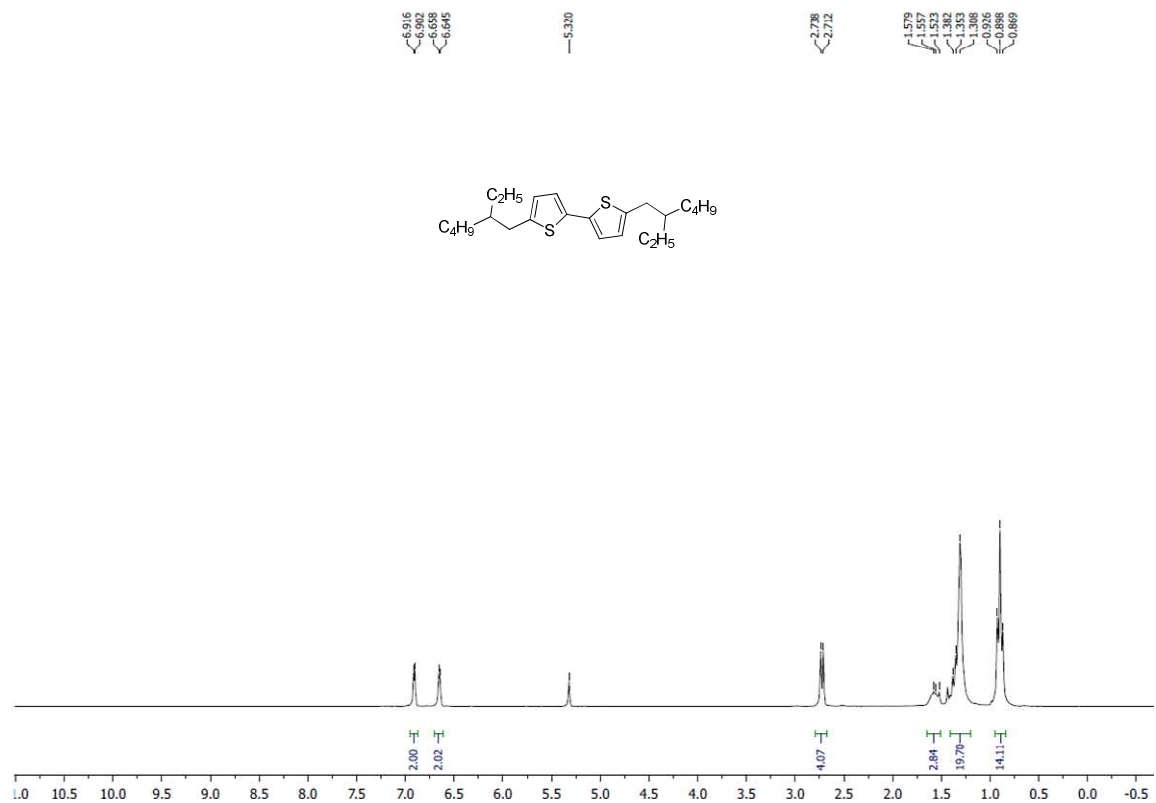

**Figure S14.** <sup>1</sup>H NMR spectrum of compound **9**.

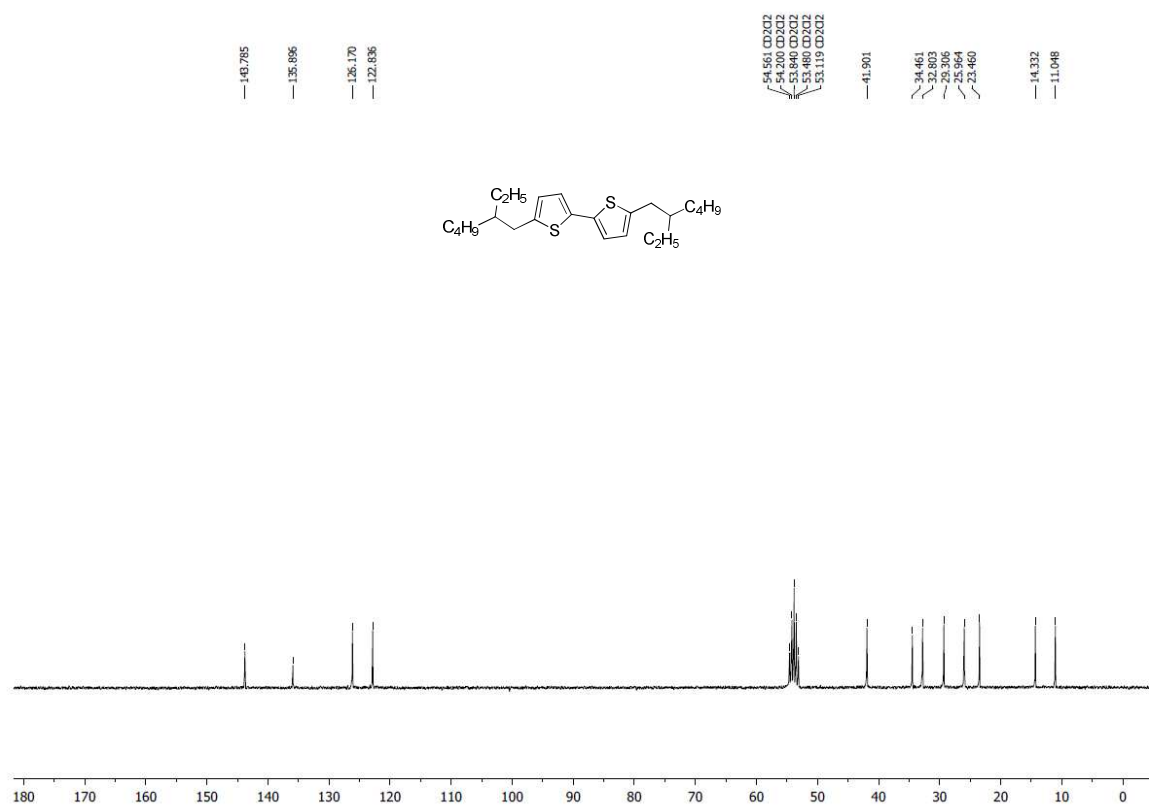

**Figure S15.** <sup>13</sup>C NMR spectrum of compound **9**.

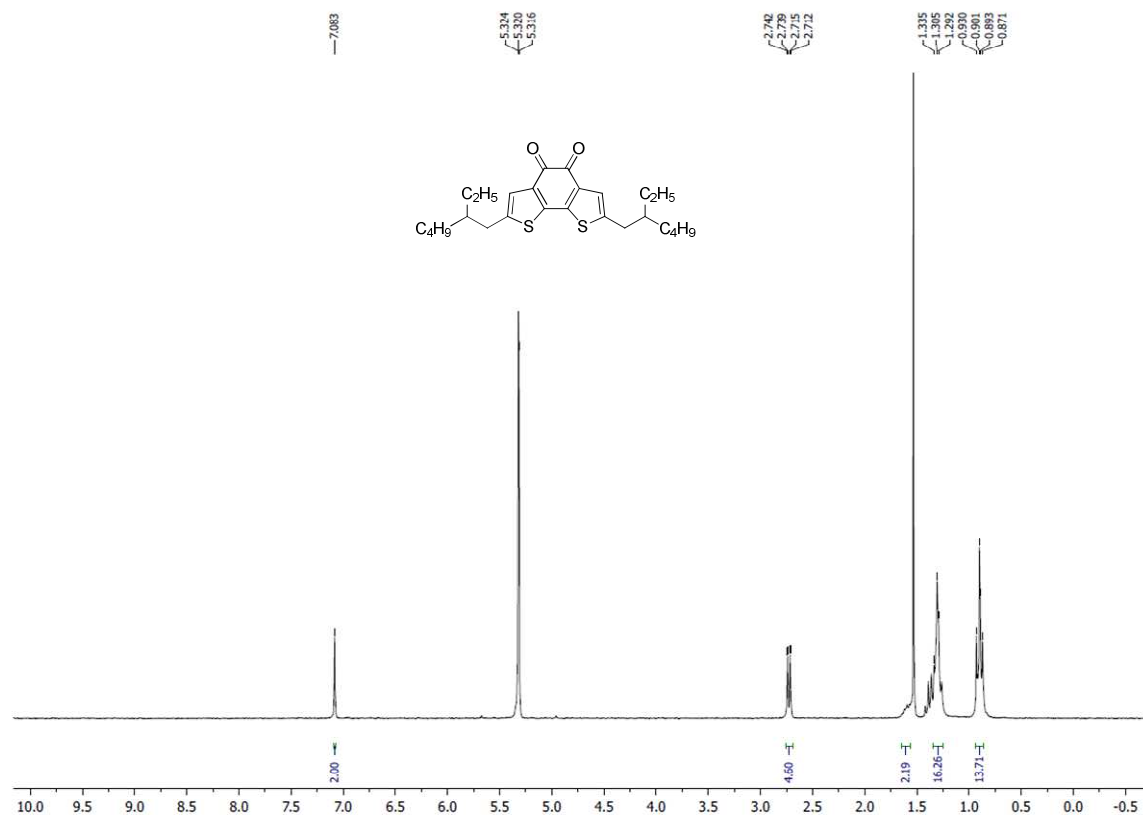

Figure S16. <sup>1</sup>H NMR spectrum of compound 10.

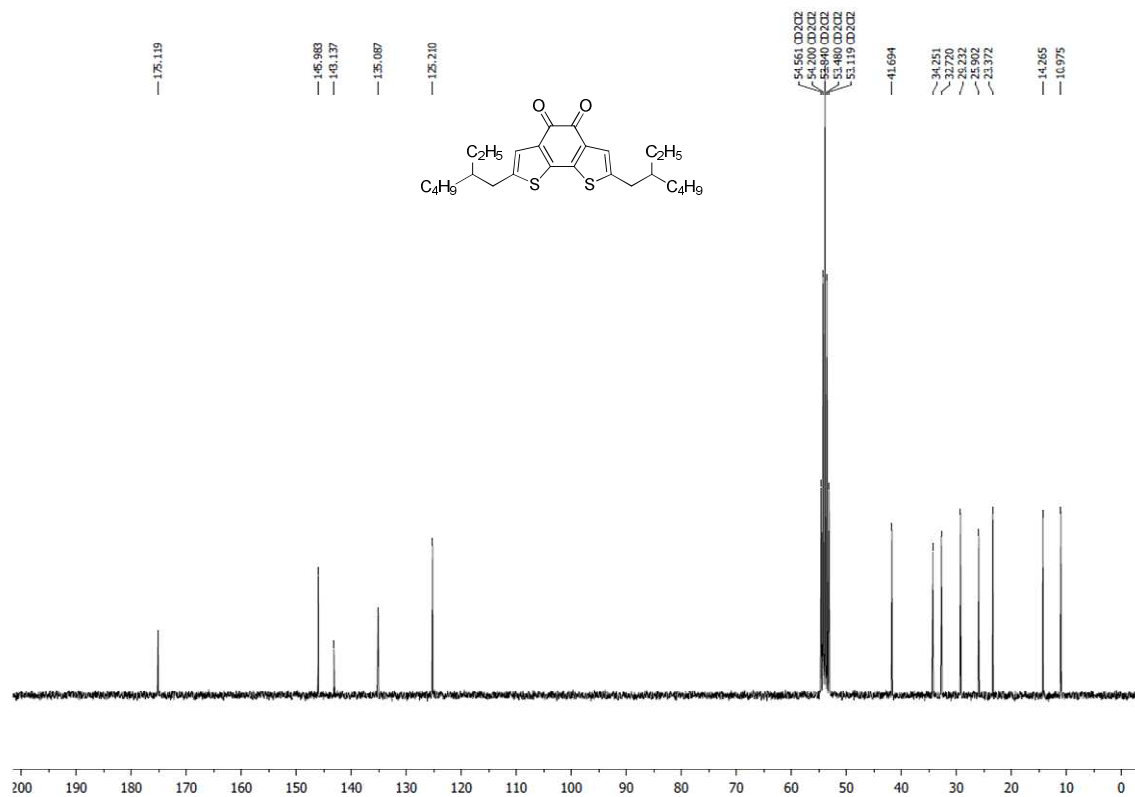

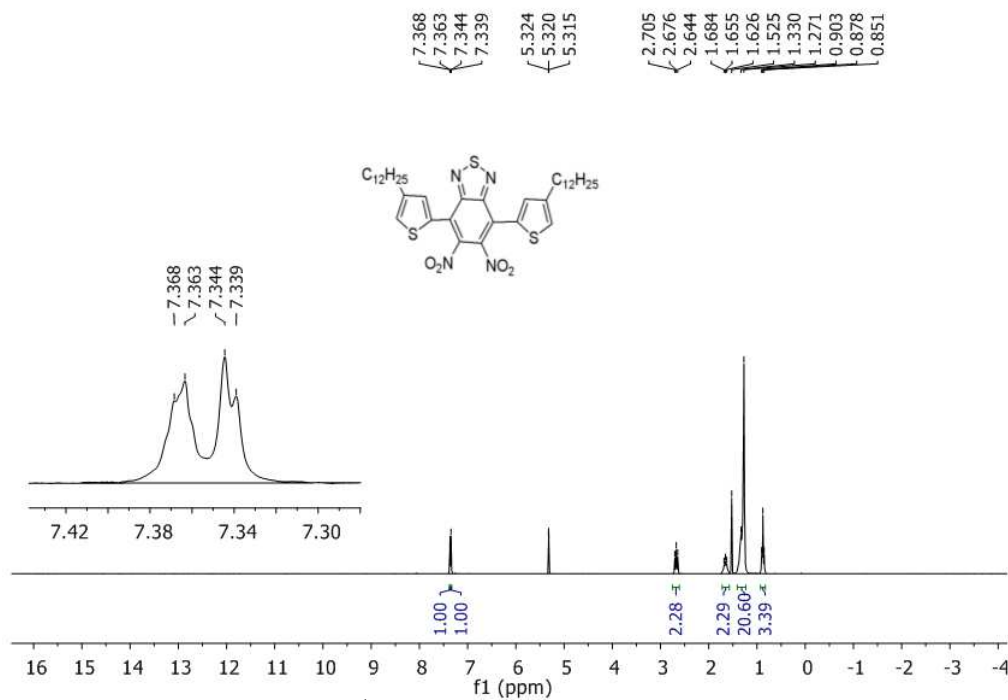

Figure S18. <sup>1</sup>H-NMR spectrum of compound 12

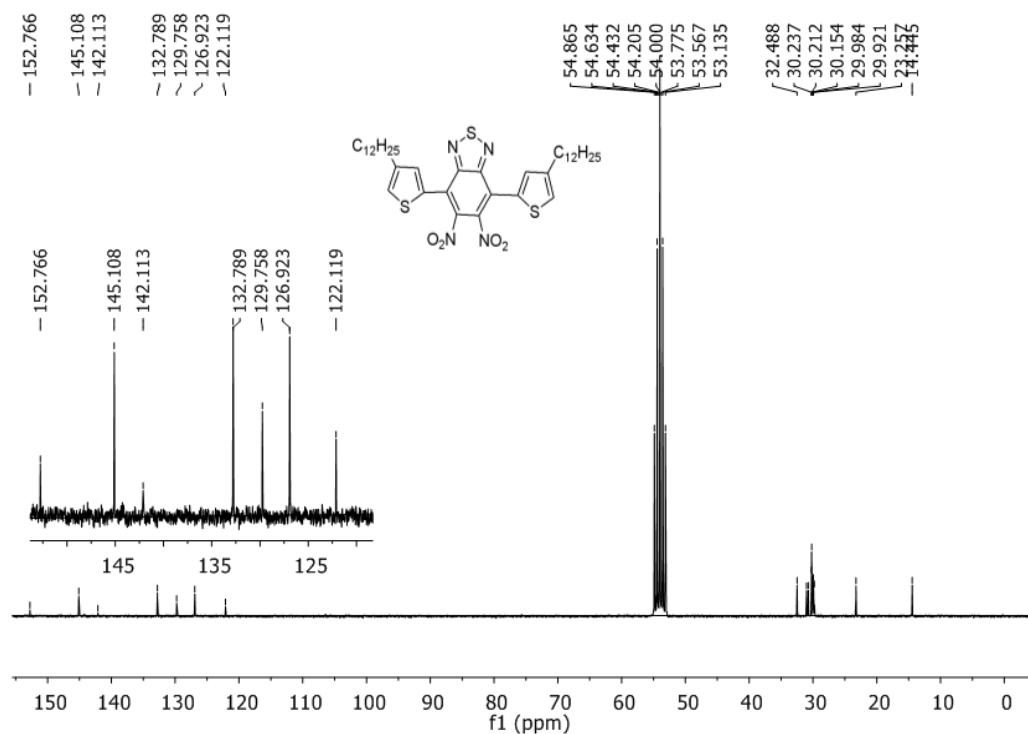

Figure S19. <sup>13</sup>C NMR spectrum of compound 12

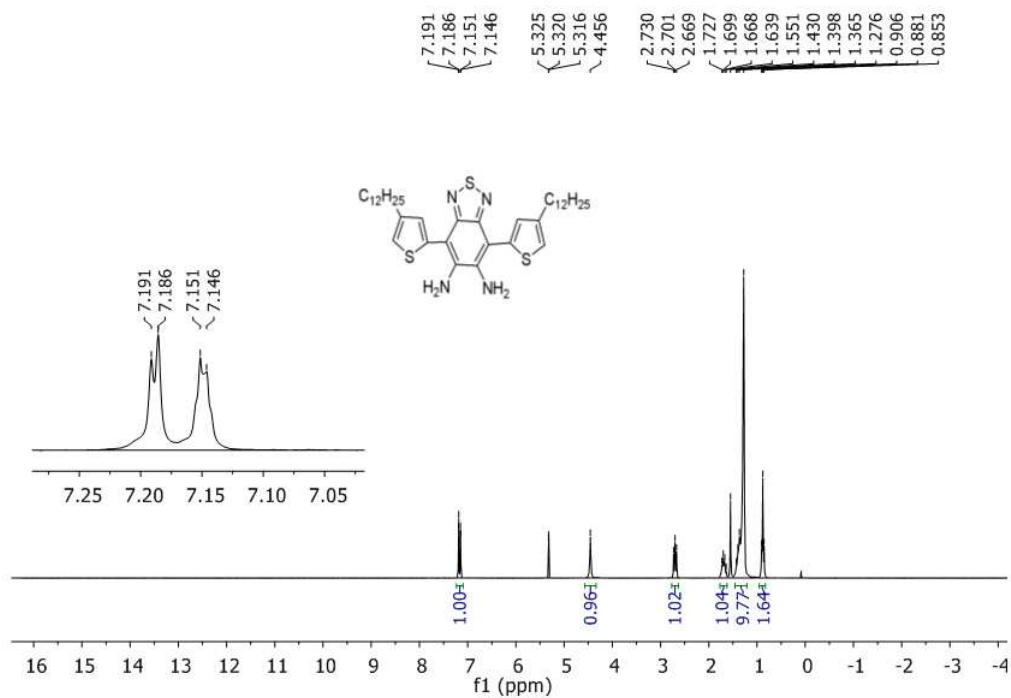

**Figure S20.** <sup>1</sup>H NMR spectrum of compound 13

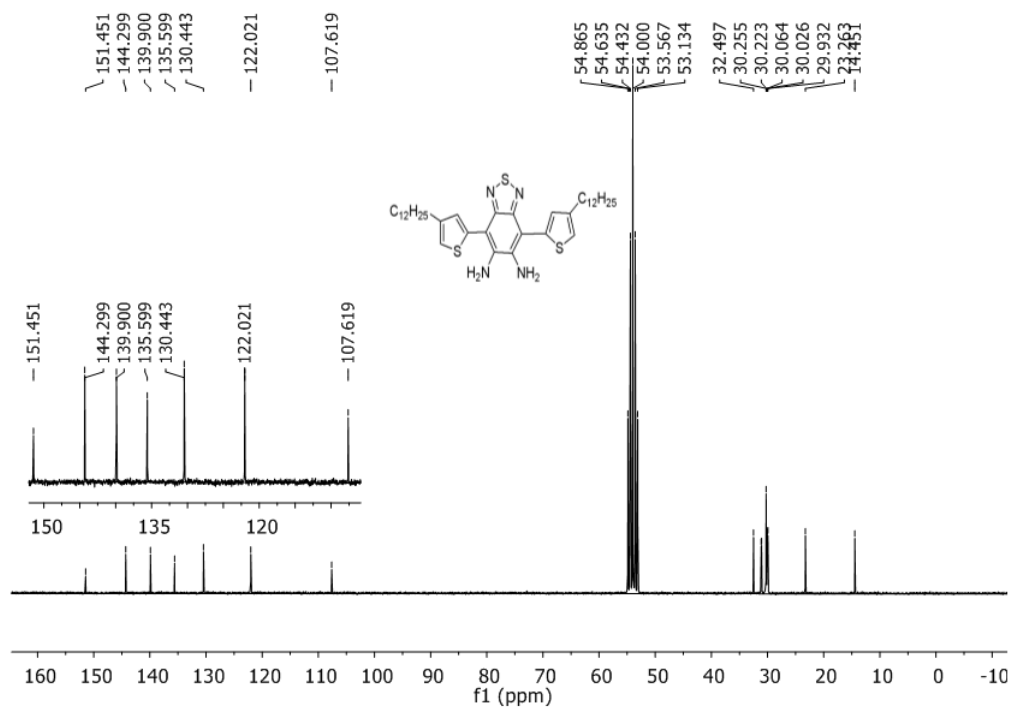

**Figure S21.** <sup>13</sup>C NMR spectrum of compound 13

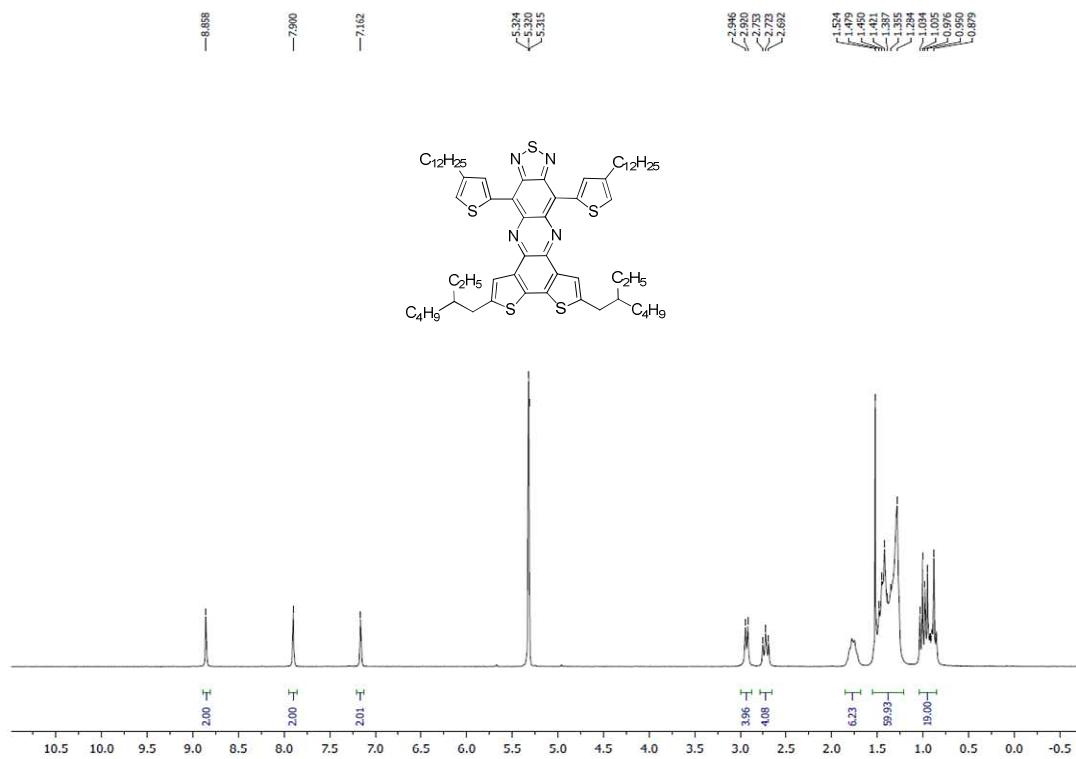

Figure S22. <sup>1</sup>H NMR spectrum of compound 14.

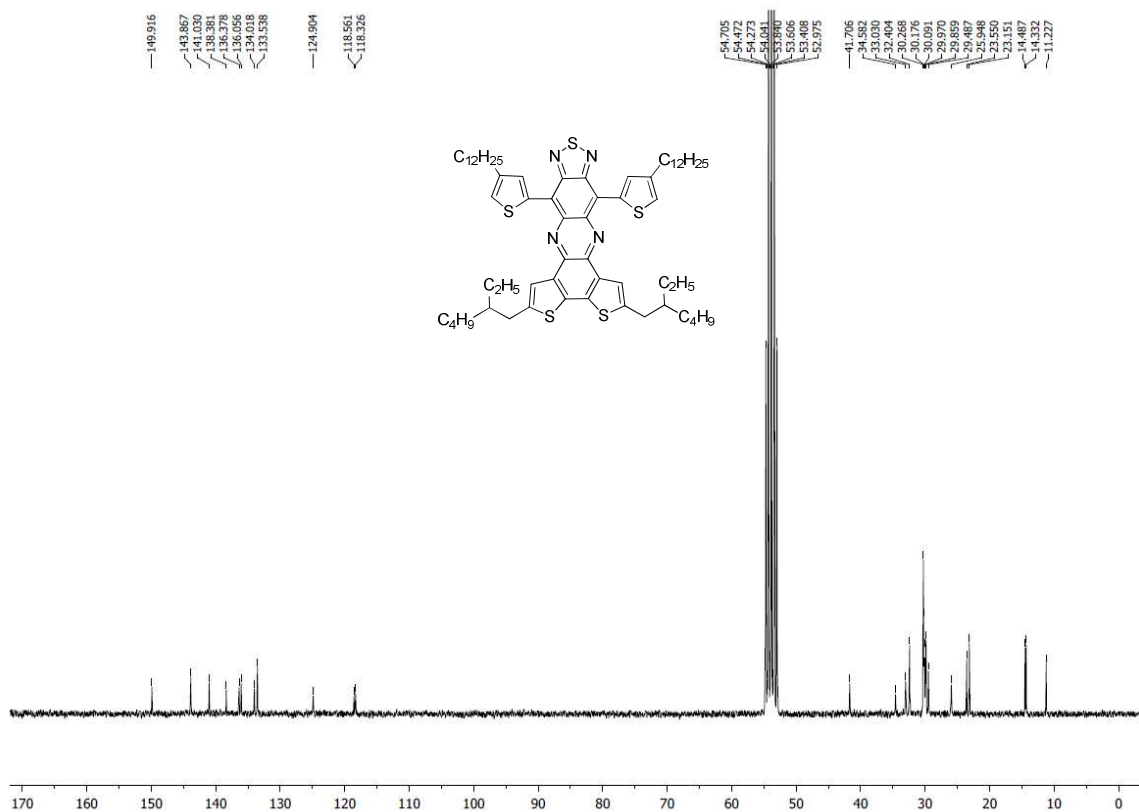

Figure S23. <sup>13</sup>C NMR spectrum of compound 14

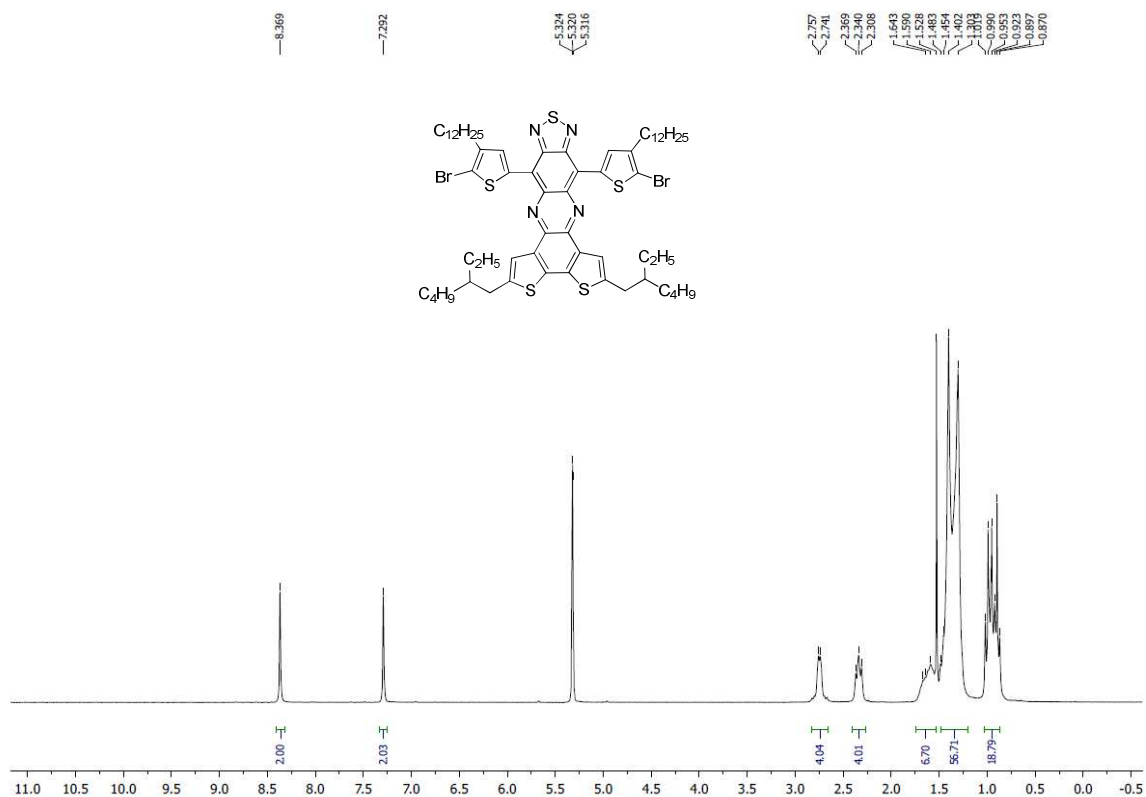

Figure S24.  $^1\text{H}$  NMR spectrum of compound BDTTQ-2.

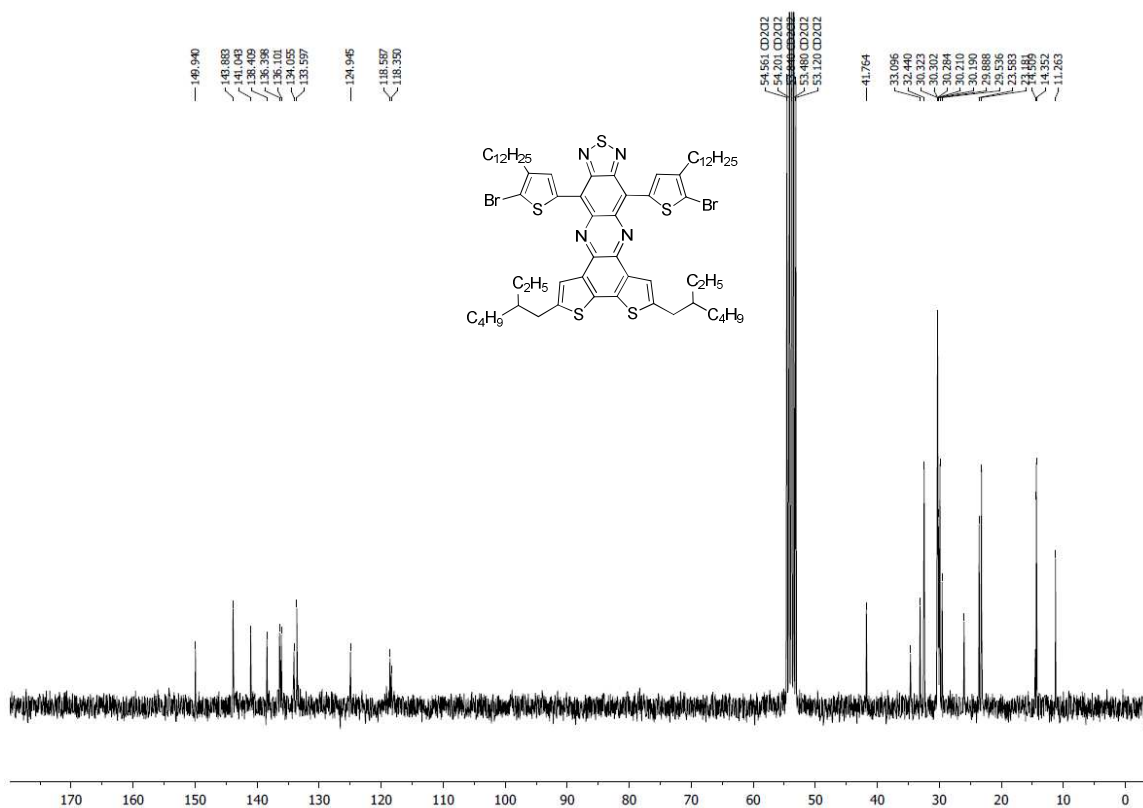

Figure S25.  $^{13}\text{C}$  NMR spectrum of compound BDTTQ-2.

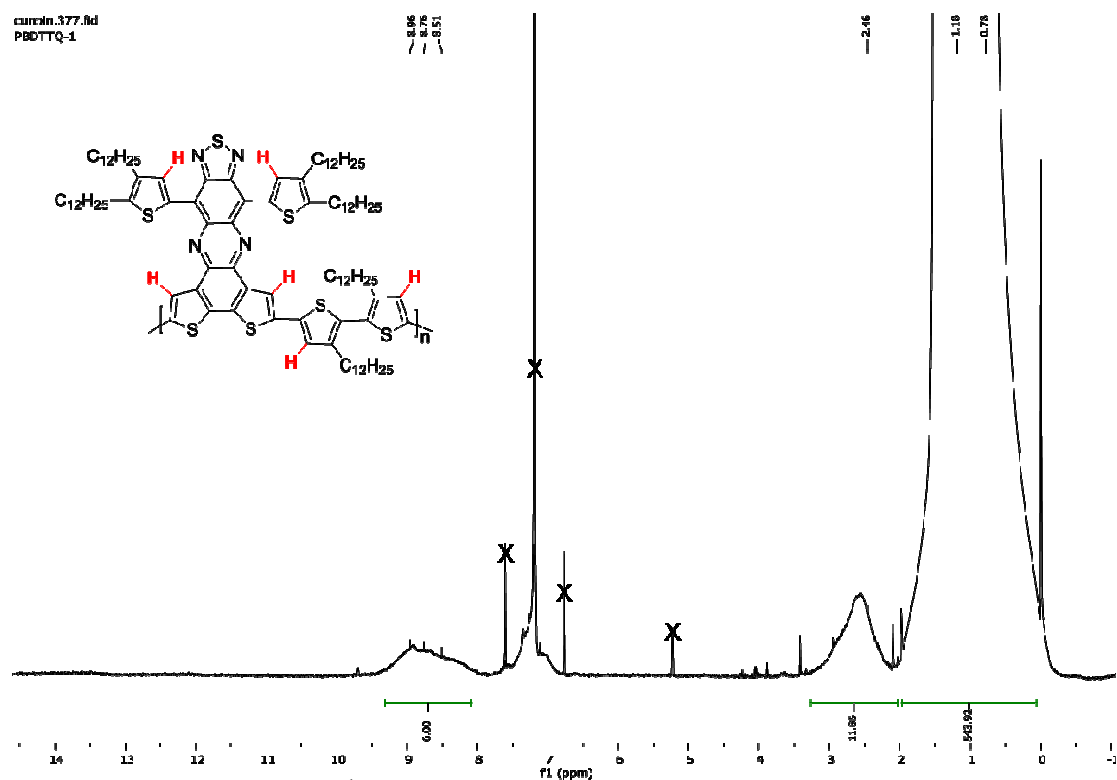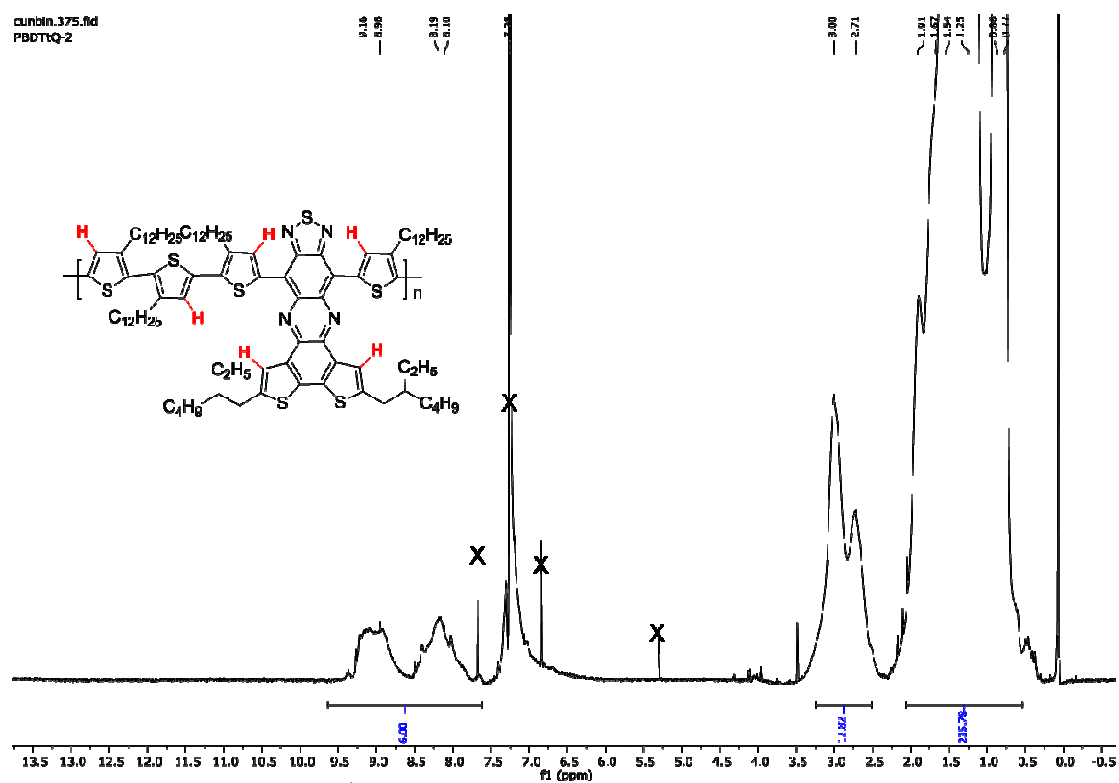



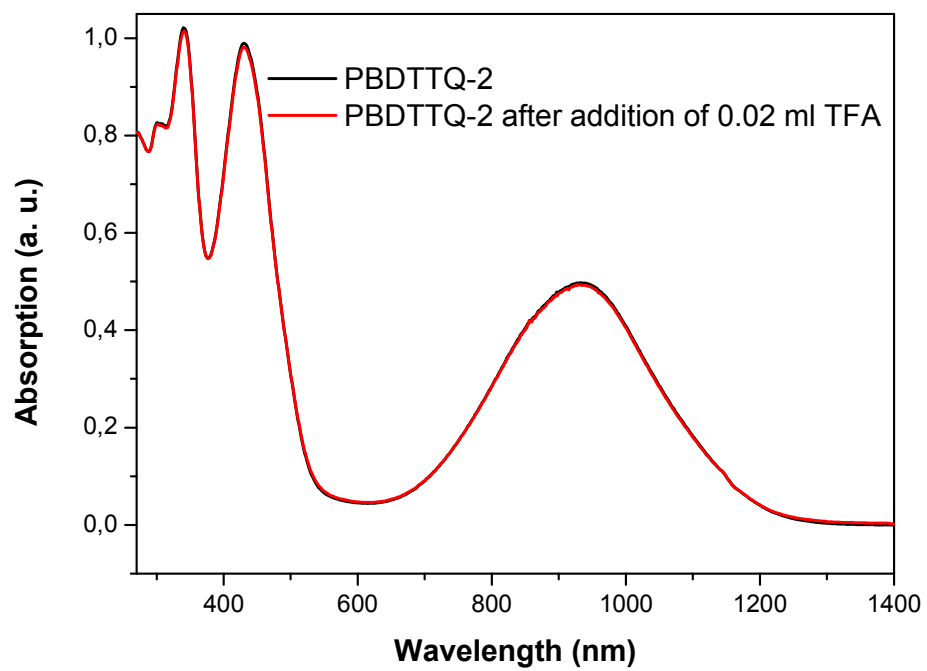

**Figure S28.** UV-Visible absorption spectra of **PBDTTQ-2** in chloroform solution ( $c=2\times 10^{-5}$  M) with and without TFA.
